# Supplementary material
Source: JCI journal article supplement (doi:10.1172/jci172834)
Supplement: sd1 [file 1]

1 SUPPLEMENTAL MATERIALS

2

3

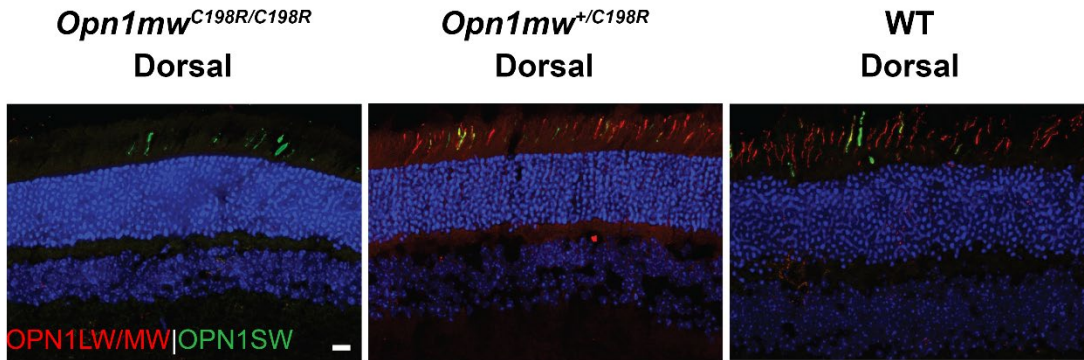

4

5 **Supplemental Figure 1. M- and S-opsin localization in homozygous and heterozygous**

6 ***Opn1mw<sup>C198R</sup>* mice.** Representative IHC images of the dorsal region of WT, heterozygous

7 *Opn1mw<sup>+/C198R</sup>* female, and homozygous *Opn1mw<sup>C198R</sup>* cross-sections collected at P30 and

8 stained with antibodies against S-opsin (green) and M-opsin (red). Scale bar = 20 $\mu$ m.

9

10

11

12

13

14

15

16

17

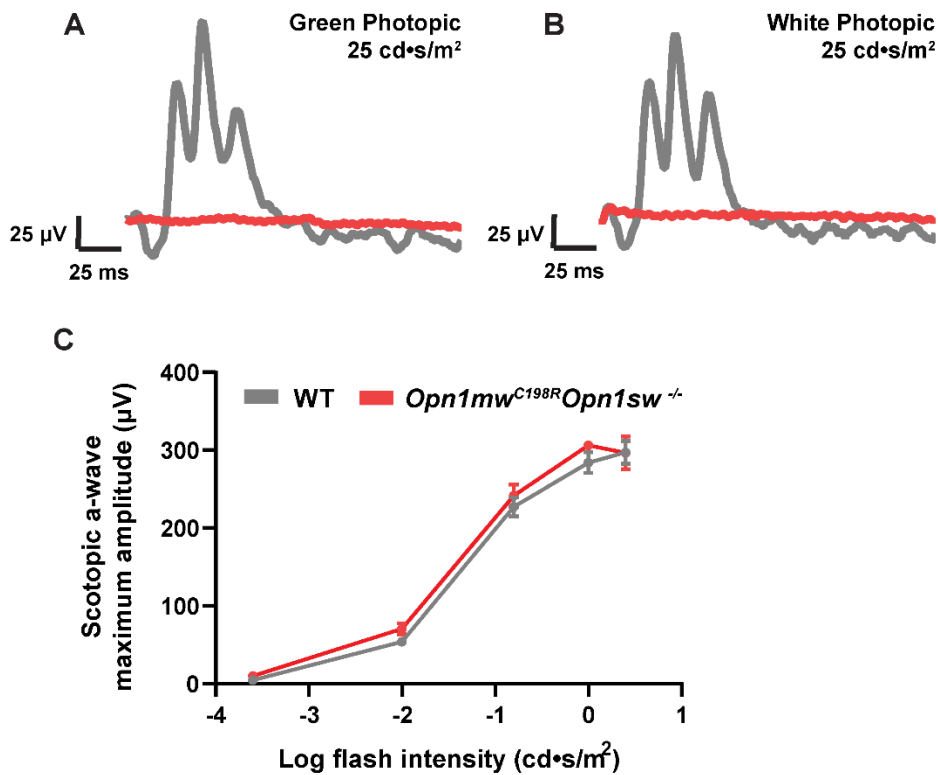

18

19

20 **Supplemental Figure 2. *Opn1mw<sup>C198R</sup>Opn1sw<sup>-/-</sup>* cones are non-functional while rods are**  
21 **normal. (A-B)** Representative waveforms of P30 WT (grey) and *Opn1mw<sup>C198R</sup>Opn1sw<sup>-/-</sup>* mice  
22 (red) following ERG recordings at 25 cd•s/m<sup>2</sup> under (A) middle-wavelength (green) and (B)  
23 photopic (white) light. (C) Sensitivity curve demonstrating the scotopic a-wave maximum  
24 amplitude of WT (grey) and *Opn1mw<sup>C198R</sup>Opn1sw<sup>-/-</sup>* mice (red) at P30 following ERG recordings  
25 under dim light conditions at various light intensities (0.0003, 0.01, 0.2, 1.0, and 2.5 cd•s/m<sup>2</sup>).  
26 Data is represented as mean ± SEM (n=6).

27

28

29

30

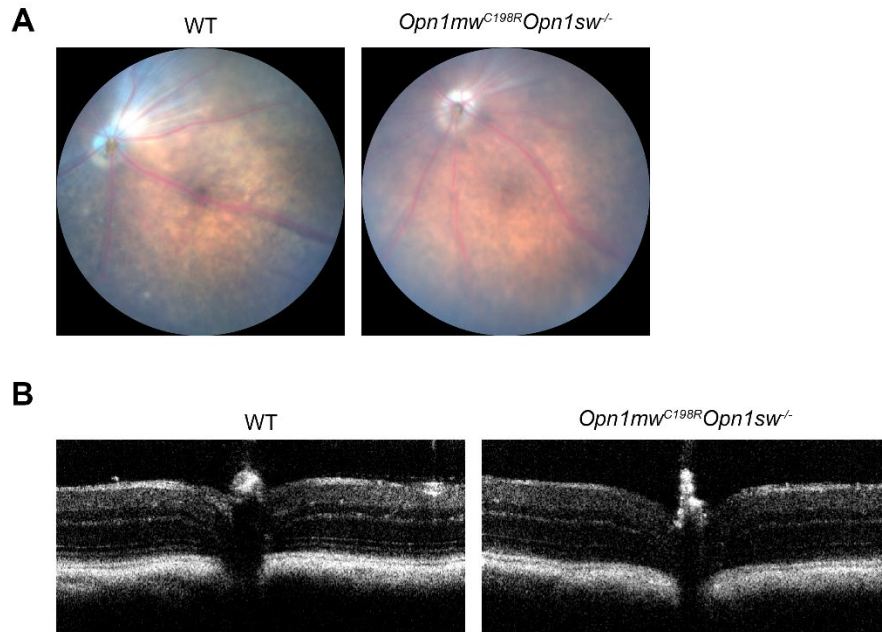

31

32

33 **Supplemental Figure 3. Normal morphology of *Opn1mw<sup>C198R</sup>Opn1sw<sup>-/-</sup>* retinas. (A)**

34 Representative bright field fundus images and **(B)** OCT images from 10-month old WT and

35 *Opn1mw<sup>C198R</sup>Opn1sw<sup>-/-</sup>* mice revealed no gross morphological abnormalities (n=3).

36

37

38

39

40

41

42

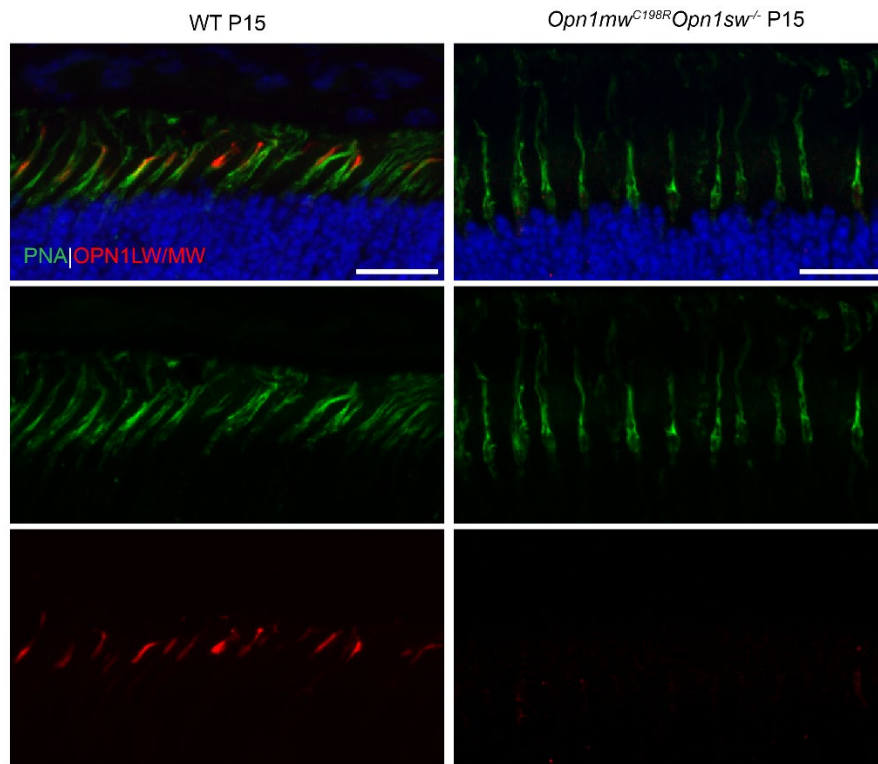

43

44 **Supplemental Figure 4. *Opn1mw<sup>C198R</sup>Opn1sw<sup>-/-</sup>* cones lack L/M-opsin expression at P15.**

45 Representative IHC images of WT (left) and *Opn1mw<sup>C198R</sup>Opn1sw<sup>-/-</sup>* (right) cross-sections stained  
46 with an antibody against L/M-opsin and with PNA. Scale bar = 20 $\mu$ m.

47

48

49

50

51

52

53

54

55

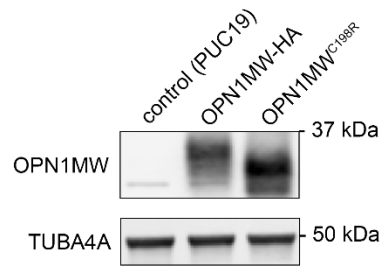

56

57

58 **Supplemental Figure 5. Antibody against L/M-opsin recognizes mutant OPN1MW<sup>C198R</sup>.**

59 Western blot analysis of HEK293T cell lysates following single-plasmid transfection with PUC19  
60 (left lane), WT OPN1MW-HA (middle lane), or mutant OPN1MW<sup>C198R</sup> protein (right lane), showing  
61 that the antibody against L/M-opsin recognizes both WT and mutant OPN1MW<sup>C198R</sup> (OPN1MW).  
62 TUBA4A was used as a loading control.

63

64

65

66

67

68

69

70  
71  
72  
73

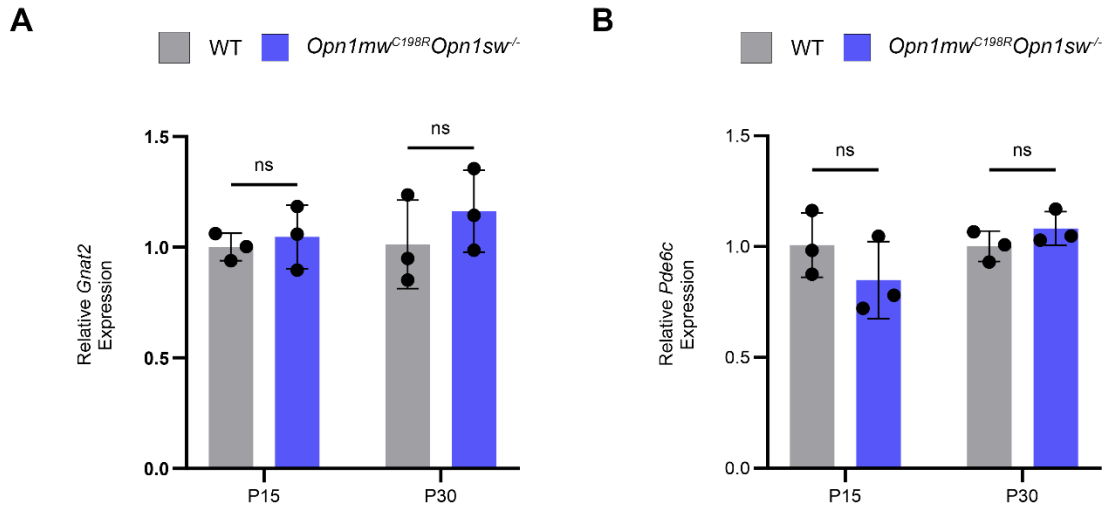

74  
75  
76

77 **Supplemental Figure 6. Gene expression of *Pde6c* and *Gnat2* is comparable between**  
78 ***Opn1mw<sup>C198R</sup>Opn1sw<sup>-/-</sup>* and WT at P15 and P30.** Real-time qPCR of **(A) *Pde6c*** and **(B) *Gnat2***  
79 mRNA levels in *Opn1mw<sup>C198R</sup>Opn1sw<sup>-/-</sup>* retinas at P15 and P30 relative to age-matched WT  
80 controls. Data represented as mean  $\pm$  SD, 2-way ANOVA ( $n = 3$ ;  $*p \leq 0.05$ ,  $**p < 0.002$ ,  $***p <$   
81  $0.001$ ).

82  
83  
84  
85

86

87

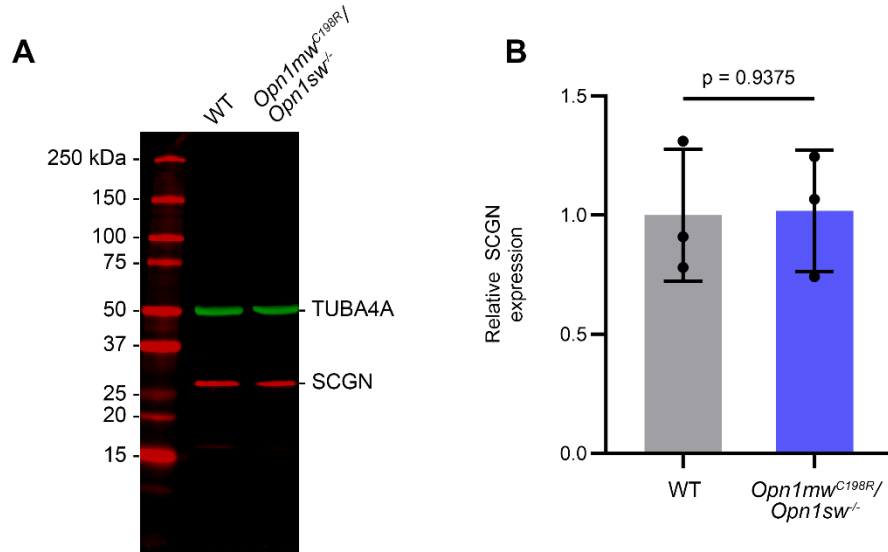

88

89

90 **Supplemental Figure 7. *Opn1mw<sup>C198R</sup>Opn1sw<sup>-/-</sup>* cones exhibit normal protein levels of the**  
91 **cone bipolar cell marker secretagogin compared to age-matched WT controls. (A)** Western  
92 blot and **(B)** quantification of 10-month old WT (left lane) and *Opn1mw<sup>C198R</sup>Opn1sw<sup>-/-</sup>* (right lane)  
93 retinal lysates with an antibody labeling the cone bipolar cell marker secretagogin (SCGN, red).  
94 TUBA4A (green) was used as a loading control. Data represented as mean ± SD, unpaired 2-  
95 tailed t-test with Welch's correction (n=3;  $p = 0.9375$ ).

96
